# Supplementary material for: The development of a silica nanoparticle-based label-free DNA biosensor
Source: Royal Society of Chemistry journal article supplement (doi:10.1039/c1nr10435g), 2011-01-01
Supplement: c1nr10435g.pdf [file c1nr10435g.pdf]

**Supporting Information**  
**The Development of a Silica Nanoparticle-based Label-free DNA biosensor**

Arnold J. Kell,<sup>1\*</sup> Lilianne Pagé,<sup>1</sup> Sophie Tan,<sup>1</sup> Isabelle Charlebois,<sup>2</sup> Maurice Boissinot,<sup>2</sup> Mario LeClerc<sup>3</sup> and Benoit Simard<sup>1</sup>

1. Steacie Institute for Molecular Sciences, National Research Council, 100 Sussex Drive, Ottawa, Ontario, Canada, K1A 0R6.
  2. Centre de recherche en infectiologie de l'Université Laval, Centre hospitalier universitaire de Québec, Pavillon CHUL, Sainte-Foy, Québec, G1V 4G2, Canada
  3. Canada Research Chair in Electroactive and Photoactive Polymers, Département de Chimie, Université Laval, Sainte-Foy, Québec, G1K 7P4, Canada.
- \* corresponding author ([arnold.kell@nrc.ca](mailto:arnold.kell@nrc.ca))

**Chemicals.** Alexa Fluor 546 carboxylic acid, succinimidyl ester, neutravidin, Alexafluor 546-modified streptavidin (3 dyes per molecule of streptavidin) and PBS buffer were purchased from Invitrogen Canada. Tetraethoxysilane (TEOS) and 3-aminopropyltriethoxysilane (APTES, 99+%) were obtained from Gelest. Succinic anhydride, sodium chloride, tween 20 and morpholinoethanesulfonate (MES) buffer were purchased from Aldrich. Ammonium hydroxide (NH<sub>4</sub>OH, 28-30 wt %) was obtained from EMD Chemicals. N,N-dimethylformamide (DMF), and ethanol were purchased from EM Science, and Commercial Alcohols, respectively. All chemicals were used as purchased. Oligonucleotides were all purchased from Integrated DNA technologies, Inc. (Coralville, IA) in a standard desalting purification grade. Throughout the preparation of nanoparticles, if water was used purified water (18 MΩ cm) was used exclusively. Water was purified with use of a Millipore Q-guard 2 purification system (Millipore Corporation). Dynamic light scattering measurements were carried out using a Nanosight nanoparticle size analysis system in water solution. Transmission electron microscopy

was carried out with a JEM-2100F FETEM (JEOL) microscope operating at 200 kV. The samples were prepared by dipping the TEM grid into a solution of the nanoparticle in water or ethanol. Scanning electron micrographs were obtained using a Hitachi S-4800 FE microscope, operating at 1.2 kV. Samples were prepared by pipetting a few drops of a nanoparticle-bead conjugate in water onto an aluminum SEM sample stub with a pipette.

### **Preparation of Alexafluor 546 surface modified ss-oligonucleotide-modified nanoparticles ( $A_{\text{probe}}$ )**

The silica nanoparticle scaffold employed in this investigation was prepared via the Stöber method and measured ~ 200 nm in diameter (measured by dynamic light scattering, Nanosight, UK) and ~ 180 nm by TEM. They were prepared in ethanol solution (28 mL) through the addition of 3.14 mL ammonium hydroxide and 1.22 mL of tetraethoxyorthosilane. Following mixing on an orbital shaker overnight, 15 mL of the nanoparticle solution was removed and placed in a 20 mL glass vial and 3-aminopropyltriethoxysilane (300 $\mu$ L, to make a 2% solution) was added to the solution and the mixture was heated and stirred at 70 °C for 2 hours. The resulting amine-modified nanoparticles were then purified via repeated centrifugation cycles in ethanol, water and the nanoparticles were finally redispersed in 10 mL ethanol.

To add different concentrations of Alexafluor 546 and neutravidin to the various amine-modified nanoparticles (architecture A), three separate 25 $\mu$ L solutions of the amine-modified nanoparticles were mixed with

- 1) 50 $\mu$ L (0.1mg/100 $\mu$ L) solution of AF546-NHS and 1 $\mu$ L (100 mg/100 $\mu$ L) succinic anhydride solution
- 2) 10 $\mu$ L (0.1mg/100 $\mu$ L) solution of AF546-NHS and 1 $\mu$ L (100 mg/100 $\mu$ L) succinic anhydride solution
- 3) 5 $\mu$ L (0.1mg/100 $\mu$ L) solution of AF546-NHS and 5 $\mu$ L (100mg/100 $\mu$ L) succinic anhydride solution.

Each nanoparticle solution was mixed for 2 hours and purified with repeated washes with MES buffer (25 mM MES, pH 6). The nanoparticles were then dispersed in 20  $\mu$ L MES buffer solution and to each solution was added 15  $\mu$ L of neutravidin (1 mg/mL) and 25  $\mu$ L of a 0.1M solution of 1-ethyl-3-(3-dimethylaminopropyl)carbodiimide hydrochloride (EDC) in MES buffer. The solutions were mixed for 2 hours and purified with MES buffer, and PBS buffer with 1M NaCl (150 mM phosphate buffer) one time to remove any physisorbed neutravidin. The nanoparticles were finally redispersed in 100  $\mu$ L 1X PBS/0.1% tween solution.

#### **Preparation of Streptavidin Alexafluor 546 surface modified ss-oligonucleotide-modified nanoparticles ( $B_{probe}$ )**

The same amine-modified nanoparticles described above were used for this modification. A 5 mL solution of the amine-modified nanoparticle was centrifuged and redispersed in DMF. The nanoparticles were then mixed with a 5% solution of succinic anhydride in DMF to convert all accessible amine groups to carboxylate groups. The resulting carboxylate-modified nanoparticles were washed with DMF 4 times and eventually redispersed in ethanol (5 mL). A solution of the COOH-modified

nanoparticles (25  $\mu\text{L}$ ) was then isolated and dispersed in 25  $\mu\text{L}$  MES buffer. Streptavidin-Alexafluor 546 (15  $\mu\text{L}$  of a 1mg/mL solution) and 25  $\mu\text{L}$  of a 0.1M solution of EDC were added and the solution was mixed for 2 hours. The resulting Streptavidin-Alexafluor 546-modified nanoparticles were then washed with MES buffer, 1X PBS/0.1% tween and 1M NaCl, and 1X PBS/0.1% tween and the nanoparticles were eventually dispersed in 100 $\mu\text{L}$  of 1X PBS/0.1% tween.

#### **Modification of the $A_{\text{probe}}$ and $B_{\text{probe}}$ with ss-oligonucleotides.**

Both streptavidin and neutravidin are tetrameric proteins well known to interact strongly with biotinylated substrates and were used to anchor biotinylated probe ss-oligonucleotides (5'-biotin-C6 spacer-ACAAATACCTGTAATTAGCGTTGCC-3') to generate  $A_{\text{probe}}$  and  $B_{\text{probe}}$ . Specifically, the 100  $\mu\text{L}$   $A_{\text{probe}}$  and  $B_{\text{probe}}$  solutions were mixed with 10 $\mu\text{L}$  of 5'-biotin-C6 spacer-ACAAATACCTGTAATTAGCGTTGCC-3' in 1X PBS/0.1% tween. The solutions were mixed for 2 hours and washed with 1X PBS/tween, 1X PBS/0.1%tween/1M NaCl and 1X PBS/0.1%-tween and finally dispersed in 100  $\mu\text{L}$  1X PBS.

#### **Quantification of 5'-biotin-C6 spacer-ACAAATACCTGTAATTAGCGTTGCC-3' on $A_{\text{probe}}$ and $B_{\text{probe}}$ .**

For each  $A_{\text{probe}}$  and  $B_{\text{probe}}$ , 10 $\mu\text{L}$  of the nanoparticle solution was centrifuged and redispersed in 60 $\mu\text{L}$  of hybridization buffer (hybridization buffer is comprised of 4 mL 20X SSPE buffer, 4 mL of formamide, 100 $\mu\text{L}$  of a 4% solution of polyvinylpyrrolidone and 1.9mL of water). A 20  $\mu\text{L}$  aliquot of 10  $\mu\text{M}$  Cy5-modified target oligomer in water

was then added, the solution was mixed for 2 hours and purified to remove unbound Cy5-modified target oligomer. The relative amount of hybridized DNA in each sample was then quantified using UV-visible spectroscopy, where the absorption peak at 654 nm could be used to quantify the amount of hybridized Cy5-labelled target oligomer (3'-TGTTTATGGACATTAATCGCAACGG-Cy5-5') in each sample. In addition, comparison of the peak intensity and relative extinction coefficient of the Alexa Fluor 546 component ( $\lambda_{\text{max}}=550$  nm) and the Cy5 component ( $\lambda_{\text{max}}=654$  nm) allows the comparison of the relative number of probe molecules (FRET donors when the duplex with the cationic polymer is added to the probe oligomer) and FRET acceptors (the AF546 molecules).

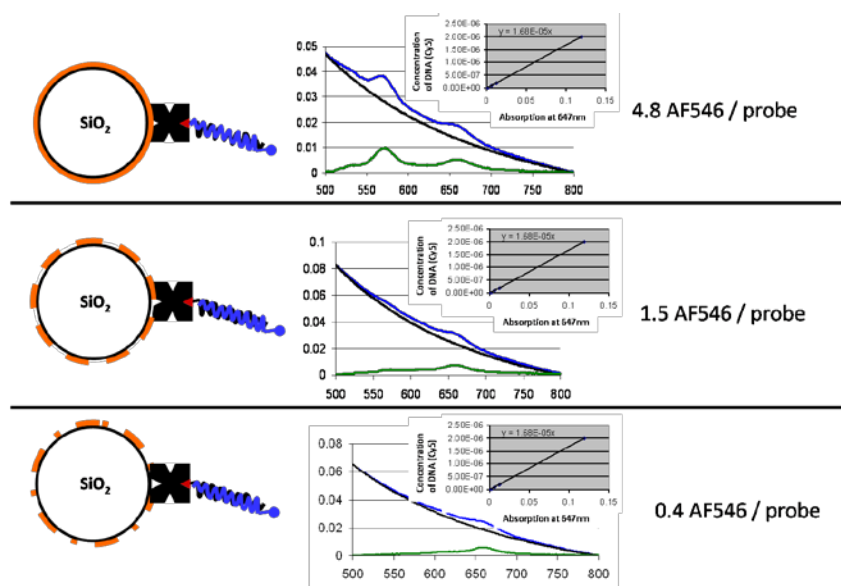

**Figure S1.** The UV-visible absorption spectra of the  $A_{\text{probe}}$  nanoparticles where the blue spectra are for the  $A_{\text{probe}}$  nanoparticles, the black spectra are unfunctionalized nanoparticle itself and the green spectra are the background subtracted spectra used to quantify the relative number of AF546 molecules (absorption at 567 nm) and the

hybridized Cy5-modified target oligomer (absorption at 654 nm). The number of AF546 molecules per probe (or target) oligomer is highlighted to the right of the spectra. Inset on each UV-visible absorption spectrum is the calibration curve used to quantify the Cy5-modified target oligomer.

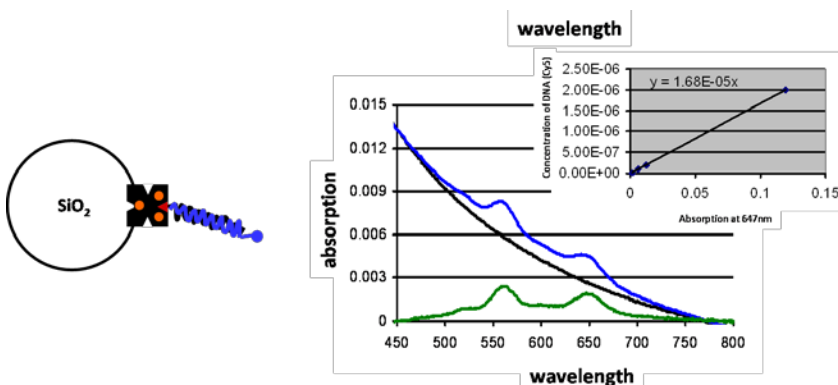

**Figure S2.** The UV-visible spectra of the  $B_{\text{probe}}$  nanoparticles where the blue spectrum is for the  $B_{\text{probe}}$  nanoparticles, the black spectrum is the unfunctionalized nanoparticle itself and the green spectrum is the background subtracted spectrum used to quantify the relative number of AF546 molecules (absorption at 567 nm) and the hybridized Cy5-modified target oligomer (absorption at 650 nm). The number of AF546 molecules per probe (or target) oligomer is three in this case. Inset on each UV-vis spectrum is the calibration curve used to quantify the Cy5-modified target oligomer.

### Preparation of nanoparticle-modified magnetic beads (n-MB).

The same amine-modified nanoparticles described above were used for this modification. A 100  $\mu\text{L}$  aliquot of the 20  $\mu\text{m}$  beads (Kisker, product # PMC-18.0, 1% w/v) were magnetically confined and washed with 100  $\mu\text{L}$  MES buffer three times. Following the third wash, the beads were redispersed in 50  $\mu\text{L}$  MES buffer containing 0.1 M EDC. A 1 mL aliquot of the amine-modified nanoparticles ( $1 \times 10^{14}$  particles /mL) described above were centrifuged, redispersed into 200  $\mu\text{L}$  of MES and added to the 20  $\mu\text{m}$  beads and mixed at room temperature for 6 hours. The resulting nanoparticle-modified beads were purified through repeated magnetic confinement s and redispersion

in fresh MES buffer (200  $\mu$ L) until there was no evidence that free nanoparticle remained in solution (addition of fluorescamine did not yield a fluorescence signal).

#### **Modification of the nanoparticle-modified beads with AF546 and succinic anhydride**

A solution of succinic anhydride in DMF (100 mg/100 $\mu$ L) and a solution of AF546-NHS (0.1mg/100  $\mu$ L) were prepared and added in a 1:10 ratio to a 50  $\mu$ L aliquot of the nanoparticle-modified beads in ethanol. The solutions were mixed for 2 hours at room temperature and washed repeatedly with MES buffer (100  $\mu$ L). The nanoparticles were finally dispersed in 200  $\mu$ L MES.

#### **Modification of the nanoparticle-modified beads (n-MB) with Neutravidin and 5'-biotin-C6 spacer-ACAAATACCTGTAATTAGCGTTGCC-3'**

The nanoparticle-modified beads were then magnetically confined and redispersed in 20  $\mu$ L MES buffer solution and 15  $\mu$ L of neutravidin (1 mg/mL) and 25  $\mu$ L of a 0.1M EDC solution in MES buffer were added. The solution was mixed for 2 hours and purified with MES buffer and PBS buffer with 1M NaCl (150 mM phosphate buffer) one time to remove any physisorbed neutravidin. The neutravidin functionalized nanoparticle-modified beads were finally redispersed in 200  $\mu$ L 1X PBS/0.1% tween solution. The nanoparticle-modified beads were then split into two 100  $\mu$ L solutions. To the first 100  $\mu$ L solution, 7.5  $\mu$ L of a 1  $\mu$ M solution of 5'-biotin-C6 spacer-ACAAATACCTGTAATTAGCGTTGCC-3' was added and mixed for 2 hours and washed with 1X PBS/tween, 1X PBS/0.1%tween/1M NaCl and 1X PBS/0.1%-tween and finally dispersed in 100  $\mu$ L 1X PBS.

In order to test the concentration of 5'-biotin-C6 spacer-ACAAATACCTGTAATTAGCGTTGCC-3' anchored to the nanoparticle surface, the remaining 100  $\mu\text{L}$  solution isolated above was mixed with 7.5  $\mu\text{L}$  of 5'-biotin-C6 spacer-ACAAATACCTGTAATTAGCGTTGCC-AF546-3' (a fluorophore-modified probe) rather than the unlabelled probe. Following incubation and mixing for 2 hours, the n-MB was isolated and a UV-visible spectrum of the supernatant was recorded and compared to a control sample diluted to the same volume. This analysis suggests that there is  $3.6 \times 10^{11}$  moles of 5'-biotin-C6 spacer-ACAAATACCTGTAATTAGCGTTGCC-3' per 100  $\mu\text{L}$  in the sample above.

### **General Label-free Biosensing of DNA**

A solution of the cationic polythiophene ( $7.4 \times 10^{-5} \text{M}$  or  $7.4 \times 10^{-6} \text{M}$  *monomer* concentration) was mixed with the oligomer-modified DNA modified nanoparticles in water such that there is a charge balance between the ss-oligomer present on the nanoparticle (2 nM) and the polythiophene. Following the addition of the polymer the mixture was incubated on a thermo-mixer at  $65^\circ\text{C}$  for 15 minutes. A fluorescence emission spectrum was then run on the sample in order to record a "fluorescence off" spectrum. After the emission spectrum was recorded 3  $\mu\text{L}$  of a 0.1M solution of NaCl in 0.1% tween was added to the nanoparticle solution followed by the addition of the appropriate concentration of target ss-oligomer, the mixture was incubated on a thermo-mixer for 15 minutes at  $65^\circ\text{C}$  and an emission spectrum was run on the nanoparticle.



### **Competiton assay for Label-free Biosensing of DNA and determination of the limit of detection.**

A solution of the cationic polythiophene ( $7.4 \times 10^{-5} \text{M}$  or  $7.4 \times 10^{-6} \text{M}$  *monomer* concentration) was mixed with the oligomer-modified DNA modified nanoparticles in water such that there is a charge balance between the ss-oligomer present on the nanoparticle (2 nM) and the polythiophene. Following the addition of the polymer the mixture was incubated on a thermo-mixer at  $65^\circ\text{C}$  for 15 minutes. A fluorescence emission spectrum was then run on the sample in order to record a “fluorescence off” spectrum. After the emission spectrum was recorded 3  $\mu\text{L}$  of a 0.1M solution of NaCl in 0.1% tween was added to the nanoparticle solution followed by the addition of the noncomplementary ss-oligomer (either 3'-CTATCTGATTGTTGAAGAAGGATT-5' or 3'-TTGATTATTGTTATCCTGTTATGCC-5', 10nM), the mixture was incubated on a thermo-mixer for 15 minutes at  $65^\circ\text{C}$  and an emission spectrum was run on the nanoparticle. After the emission spectrum was recorded the appropriate concentration of complementary target ss-oligomer (3'-TGTTTATGGACATTAATCGCAACGG-5') was added to the nanoparticle, the mixture was incubated on a thermo-mixer for 15 minutes at  $65^\circ\text{C}$  and an emission spectrum was recorded. This procedure was followed for the acquisition of the limit of detection curves.

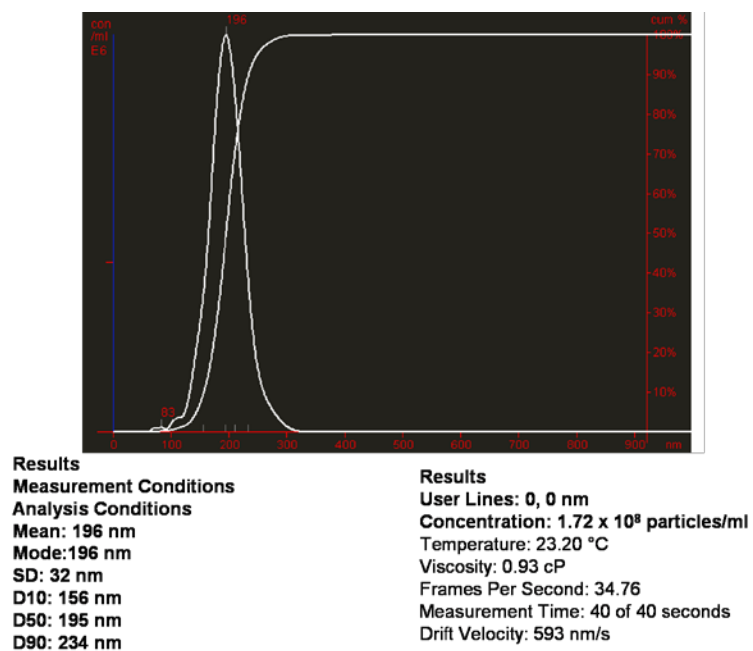

**Figure S3.** A representative plot of the dynamic light scattering data used to characterize the nanoparticles.

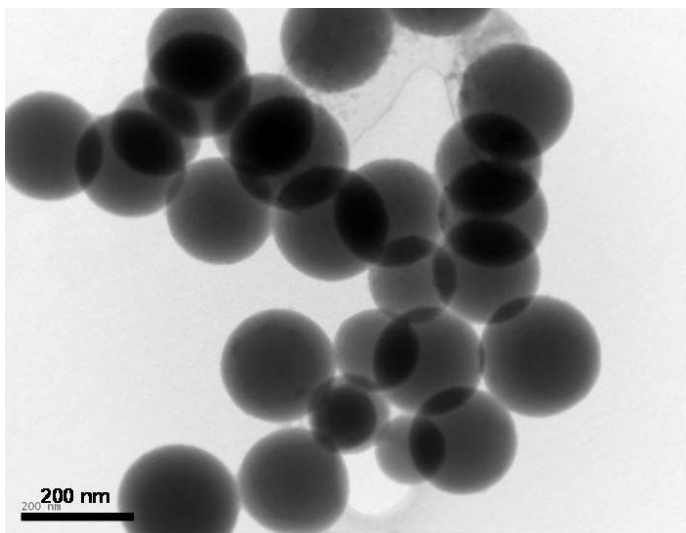

**Figure S4.** A representative transmission electron microscopy image of the nanoparticles.

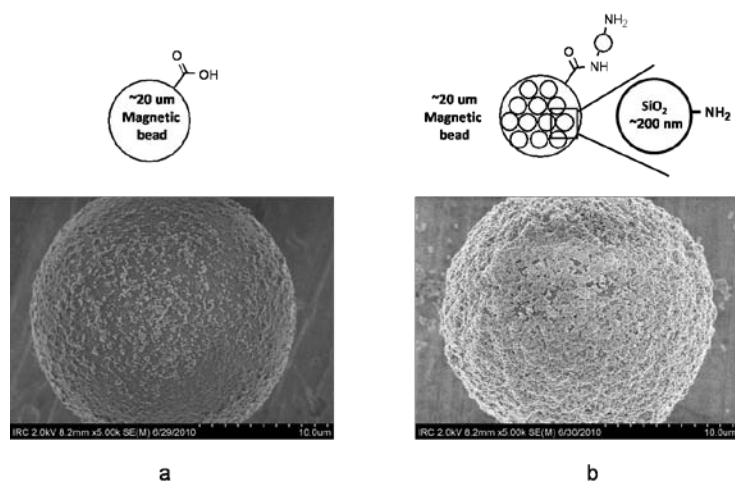

**Figure S5.** A representative scanning electron microscopy image of the 20 μm beads (a) and the nanoparticle-modified 20 μm beads (b).

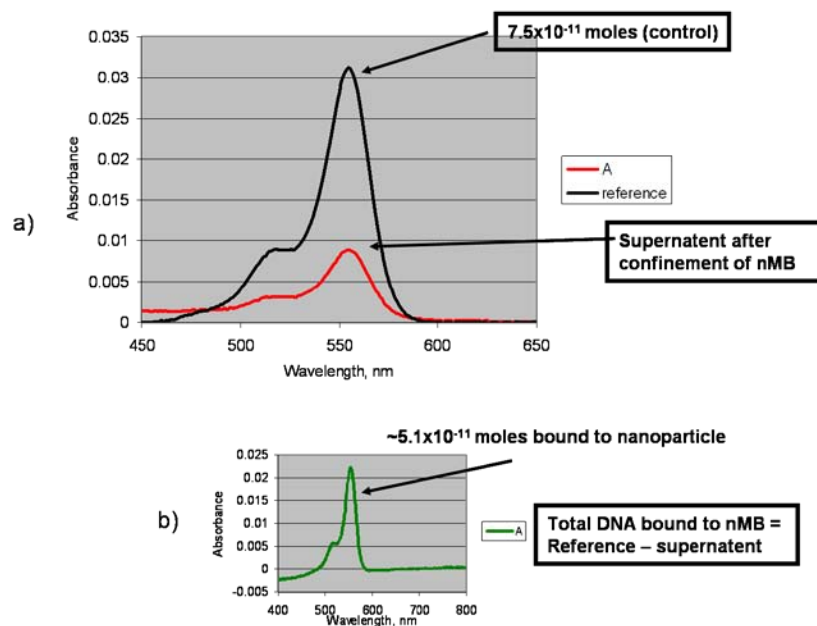

**Figure S2.** The UV-visible spectra of the ss-DNA (5'-biotin-C6 spacer-ACAAATACCTGTAATTAGCGTTGCC-AF546-3') used to quantify the concentration of oligomer on the n-MB particles, where the black spectrum is the total concentration of 5'-biotin-C6 spacer-ACAAATACCTGTAATTAGCGTTGCC-AF546-3' used in the immobilization reaction, and the red curve is the concentration of 5'-biotin-C6 spacer-ACAAATACCTGTAATTAGCGTTGCC-AF546-3' left over after the n-MB<sub>probe</sub> is isolated (a). Below the green spectrum in (b) represents the concentration of 5'-biotin-C6 spacer-ACAAATACCTGTAATTAGCGTTGCC-AF546-3' bound to n-MB<sub>probe</sub> based on a subtraction of the red spectrum from the black spectrum in (a).
